# Supplementary material for: A backscattering light detection assembly for sensitive determination of analyte concentrated at the liquid/liquid interface using the interaction of quercetin with proteins as the model system
Source: Royal Society of Chemistry journal article supplement (doi:10.1039/b408266d), 2004-12-02
Supplement: b408266d.pdf [file b408266d.pdf]

**Supporting Information for**  
**A Backscattering Light Detection Assembly Used for**  
**Sensitive Determination of Analyte Concentrated at**  
**Liquid/Liquid Interface**

**Cheng Zhi Huang\*, Yong Hong Wang, Hong Ping Guo, and Yuan Fang Li**

*College of Chemistry and Chemical Engineering, Southwest Normal University, Chongqing 400715,  
People's Republic of China*

E-mail: [chengzhi@swnu.edu.cn](mailto:chengzhi@swnu.edu.cn); Telephone: +86-23-68253822; Fax: +86-23-68866796

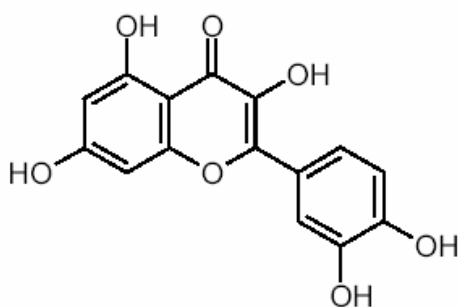

1. Molecular structure of QT:

Fig. S1. Molecular structure of QT.

## 2. The Optimization of the General Procedures:

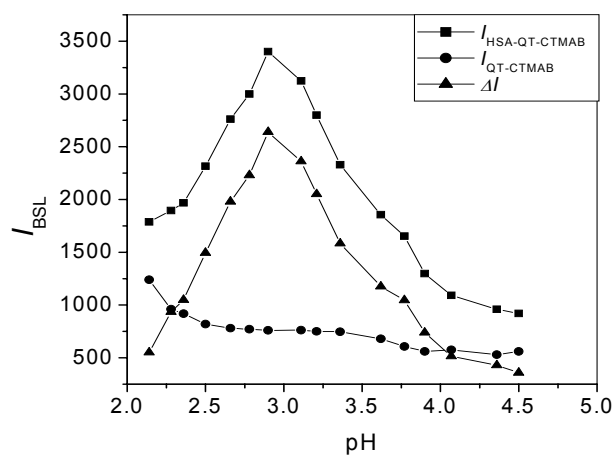

Fig. S2. Effect of pH on BSL intensity of QT-CTMAB-HSA at the  $\text{H}_2\text{O}/\text{CCl}_4$  interface. Concentrations: QT,  $1.6 \times 10^{-5}$  M; CTMAB,  $6.0 \times 10^{-6}$  M. HSA,  $0.5 \mu\text{g}/\text{mL}$ . pH 2.90.

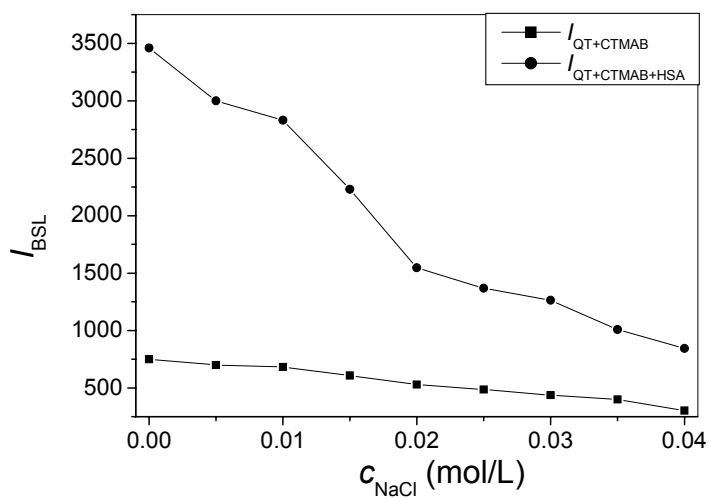

Fig. S3. Effect of ionic strength on the BSL intensity. Concentrations: QT,  $1.6 \times 10^{-5}$  M; CTMAB,  $6.0 \times 10^{-6}$  M; HSA,  $0.5 \mu\text{g}/\text{mL}$ . pH 2.90.

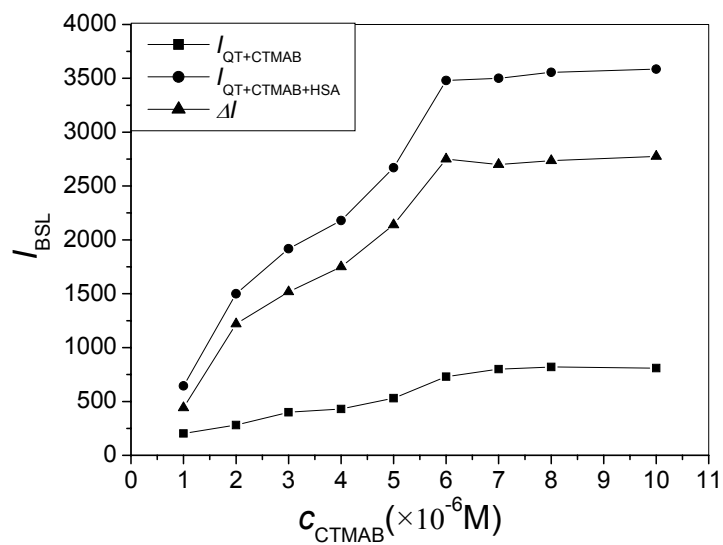

Fig. S4. Effect of surfactant concentration on BSL intensities of the  $H_2O/CCl_4$  interface. Concentrations: QT,  $1.6 \times 10^{-5} M$ ; HSA,  $0.5 \mu g/mL$ . pH 2.90, ionic strength, 0.003 M.
